# Supplementary material for: Antitumor Potential of Sericite Treatment Mediated by Cell Cycle Arrest in Triple-Negative MDA-MB231 Breast Cancer Cells
Source: Hindawi journal article supplement (doi:10.1155/2022/2885293), 2022-09-25
Supplement: f1 [file 2885293.f1.pdf]

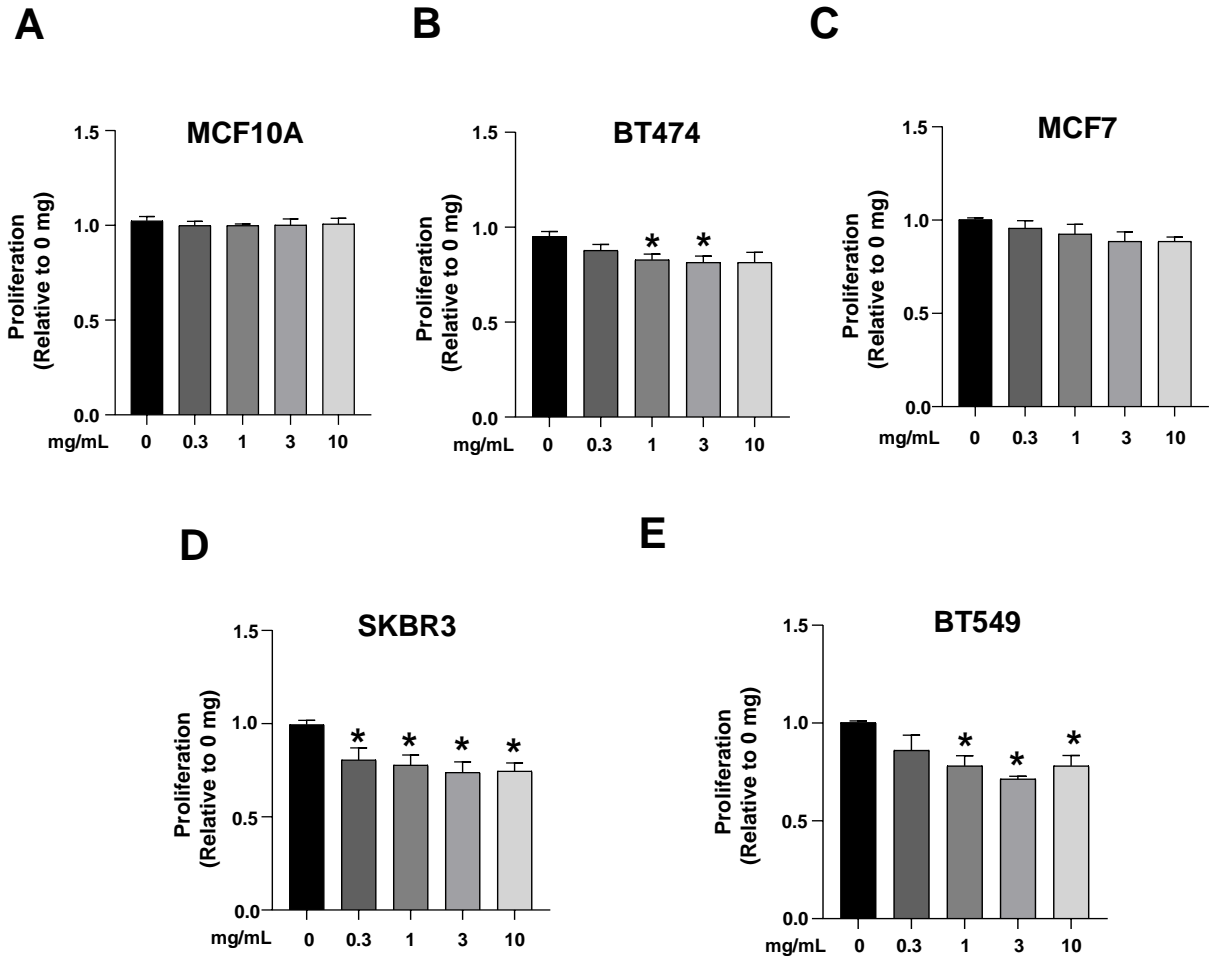

**Supplementary Fig.1. Effect of Sericite treatment on cell proliferation of different breast cancer cell lines.**

(A) MCF10A (B) BT474 (C) MCF7 (D) SKBR3 and (E) BT549 cells were treated with different concentrations of sericite for 24 h followed by detection of cell proliferation using CCK-8 assay. Data are presented as the mean  $\pm$  SEM of three independent experiments. \*P < 0.05 vs. 0 mg/mL sericite-treated cells.

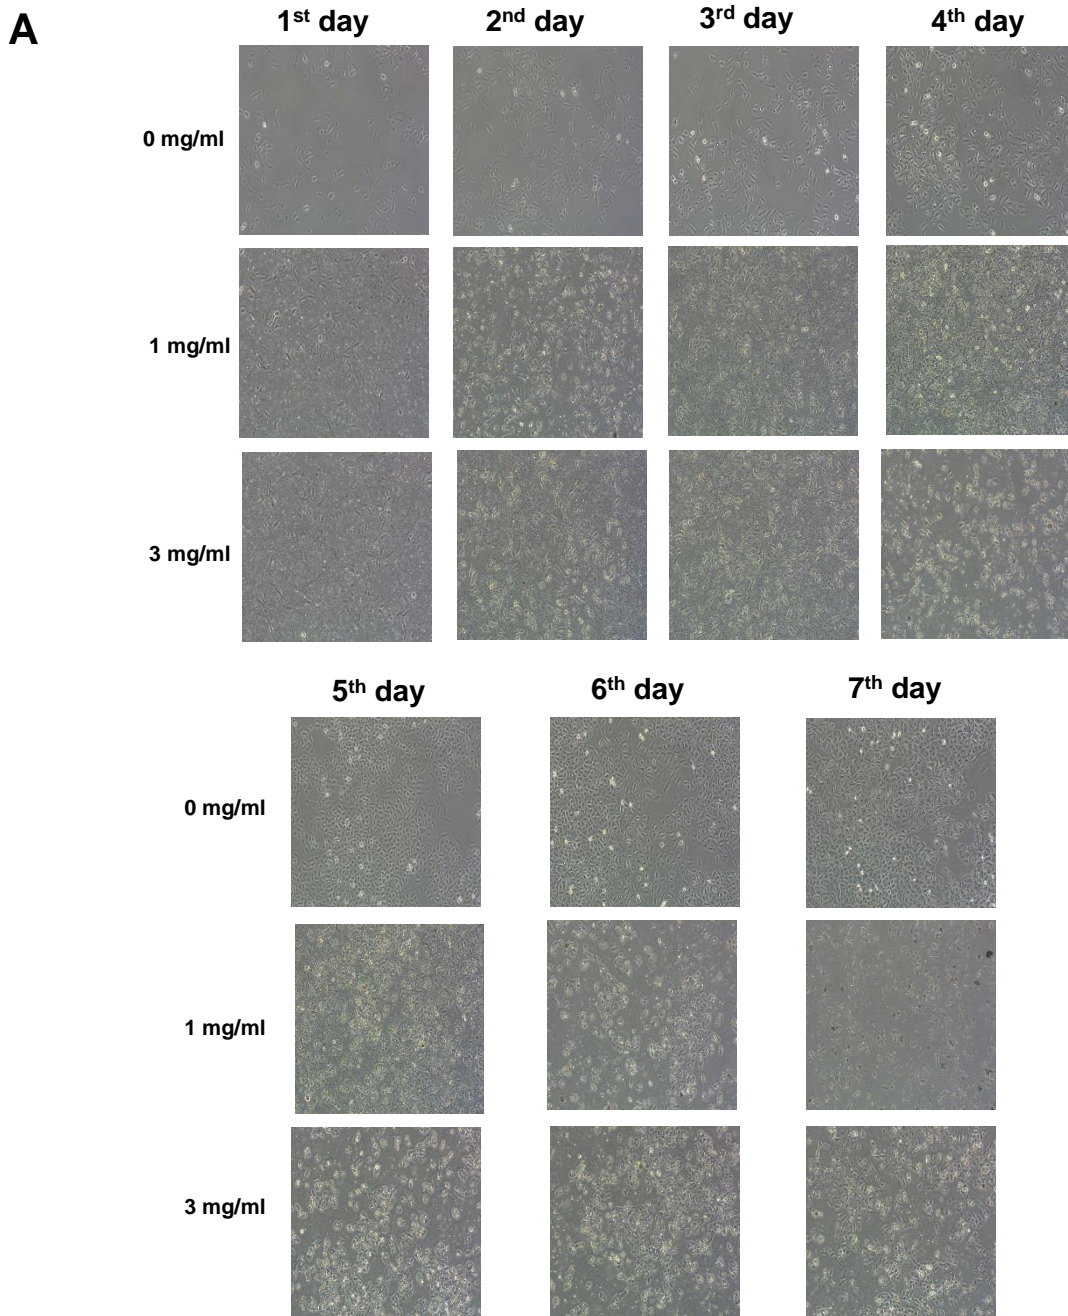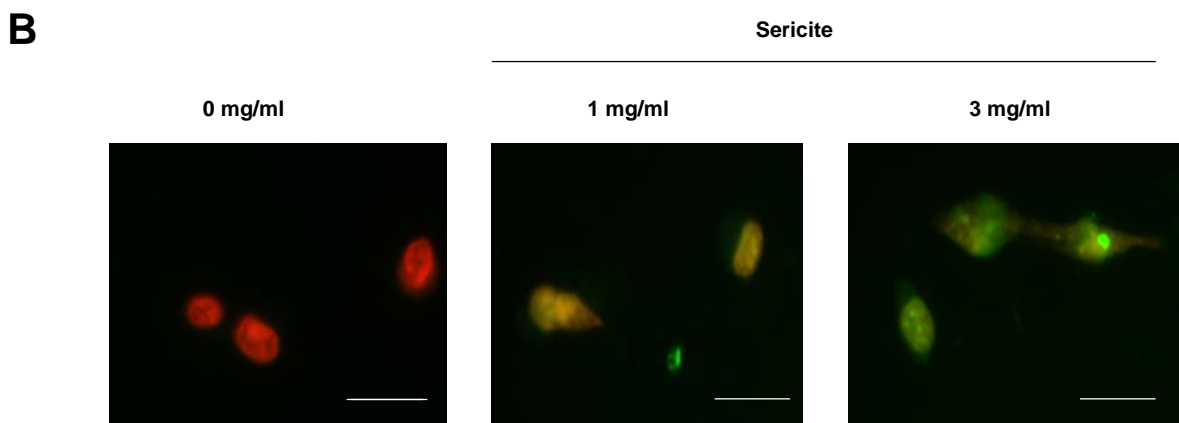

**Supplementary Fig.2. Effect of Sericite treatment on cell morphology and apoptosis in MDA-MB231 cells.**

(A) Effect of sericite treatment on cell morphology up to 7 days of incubation. (B) Images show merged staining with Propidium Iodide/RNase A (red) and FITC-dUTP (green) (TUNEL) after sericite treatment in MDA-MB231 cells. Scale bar = 20  $\mu$ m. Data are presented as the mean  $\pm$  SEM of three independent experiments.

**A**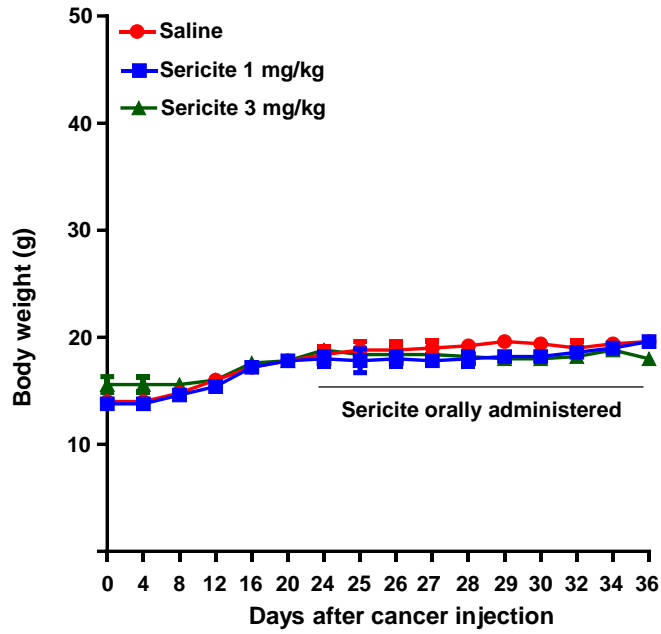**B**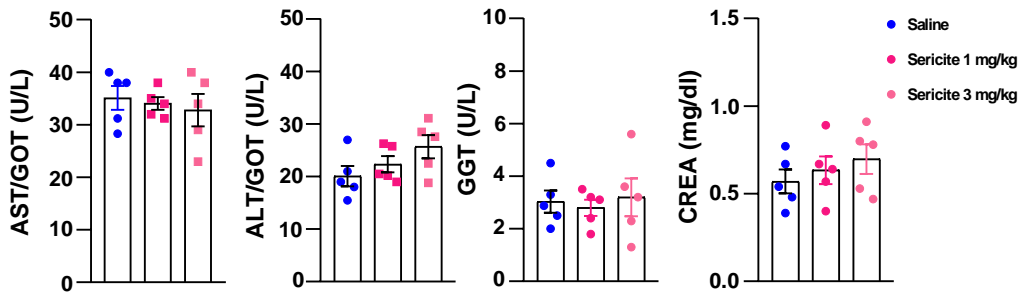

**Supplementary Fig.3. Effect of Sericite treatment on the health of mice.**

(A) Changes in animal body weight. (B) Blood analysis of mice was performed to analyze the kidney and liver function. Aspartate aminotransferase (AST), Alanine aminotransferase (ALT) and Gamma-glutamyl transpeptidase (GGT) are a measure of liver function. Creatinine (CREA) is the measure of kidney function. The values of all the components were in the normal range (AST: 0-40 U/L, ALT: 0-45 U/L, GGT: 0-66 U/L and CREA: 0.5-1.3 mg/dl). Data are presented as the mean  $\pm$  SEM of five independent experiments.

| Primer         | Forward                                    | Reverse                                     | Accession Num. |
|----------------|--------------------------------------------|---------------------------------------------|----------------|
| <i>HSP90</i>   | 5'-GGG CTT CGA<br>GGT GGT GTA<br>TAT-3'    | 5'-TGC CTT GCT<br>CTC CTC CAT<br>TTT-3'     | NM_001017963.3 |
| <i>HSP70</i>   | 5'-AGG TGA ACT<br>ACA AGG GCG<br>AGA-3'    | 5'-ATG ATC CGC<br>AGC ACG TTT<br>AGA-3'     | NM_005345.6    |
| <i>HSP60</i>   | 5'-AGT CCA TTG<br>TCC CTG CTC<br>TTG-3'    | 5'-TGA CTG CCA<br>CAA CCT GAA<br>GAC-3'     | NM_199440.2    |
| <i>HSP27</i>   | 5'-GAG AGT TCT<br>GTC GCA CCT<br>ATG-3'    | 5'-AGC AGG AAG<br>CAG GGA GAT<br>GAT GTA-3' | AB020027.1     |
| <i>NOX4</i>    | 5'-GCA GGA GAA<br>CCA GGA GAT<br>TG-3'     | 5'-CAC TGA GAA<br>GTT GAG GGC<br>ATT-3'     | NM_016931.5    |
| <i>p22phox</i> | 5'-CGC TGG CGT<br>CCG CCT GAT<br>CCT CA-3' | 5'-ACG CAC AGC<br>CGC CAG TAG<br>GTA GAT-3' | NM_000101.4    |
| <i>GAPDH</i>   | 5'-ATG GGG AAG<br>GTG AAG GTC G-3'         | 5'-GGG GTC ATT<br>GAT GGC AAC<br>AAT A      | NM_001357943.2 |

**Table S1.** Information of qPCR primers

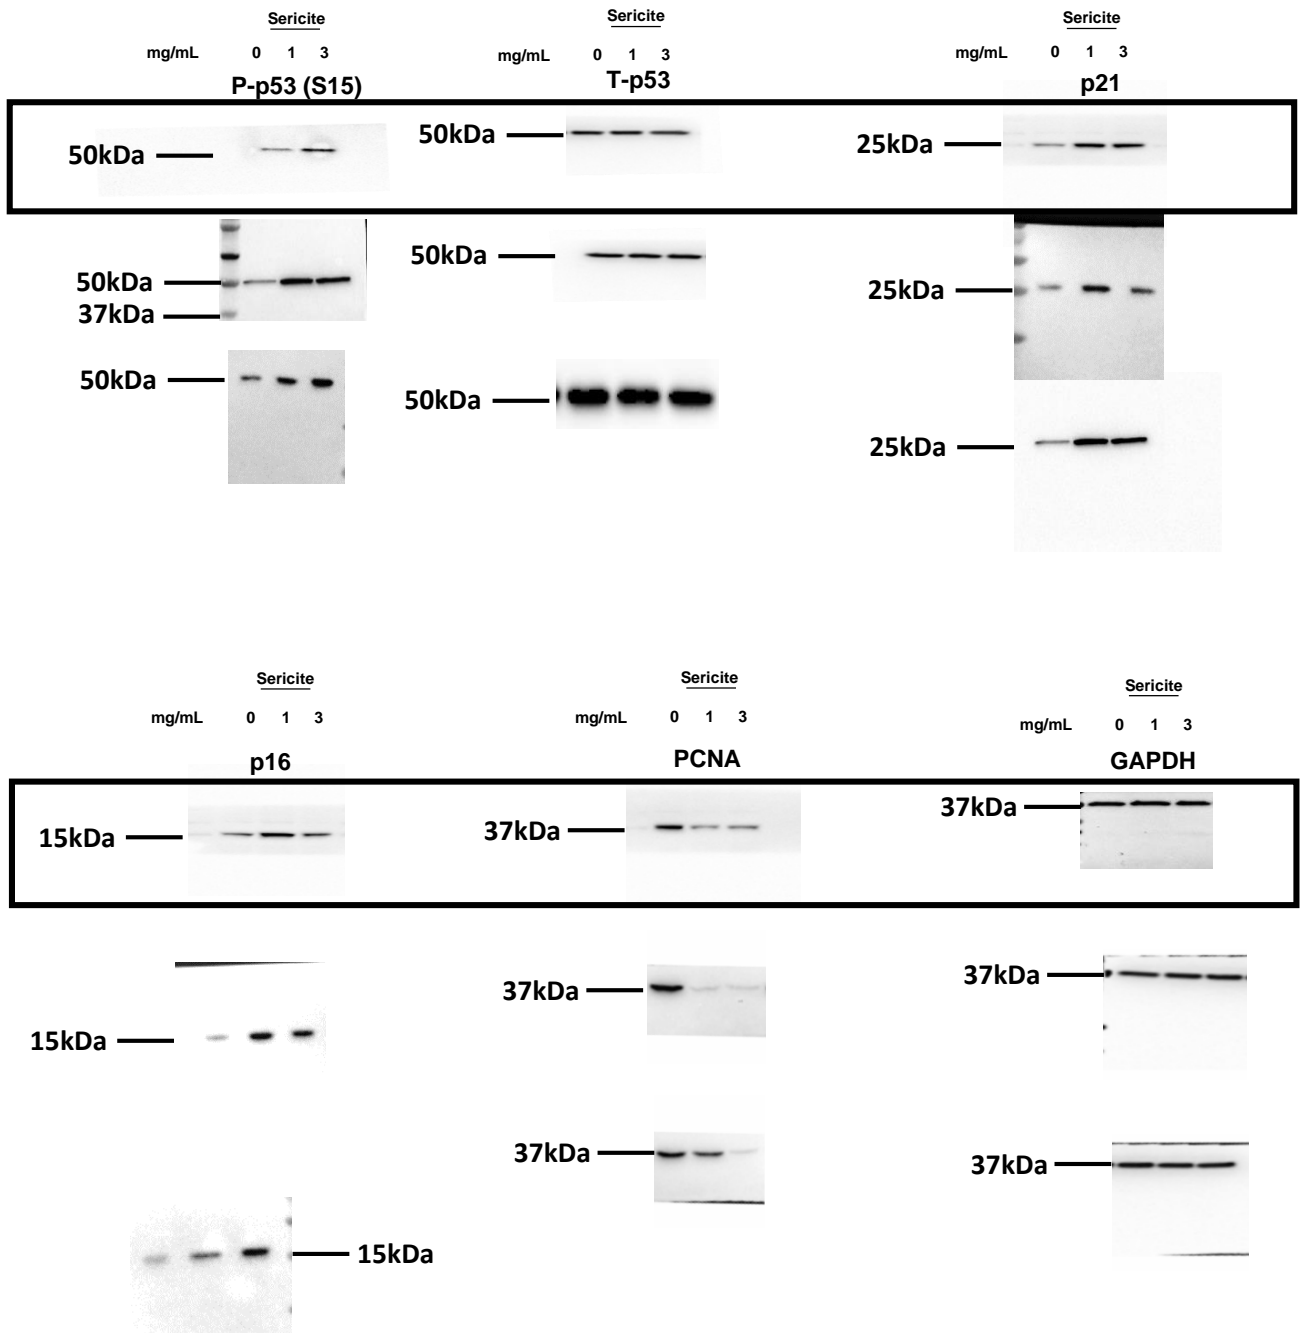

Supplementary Fig.5. Full-length western blot gel image for figure 1D.

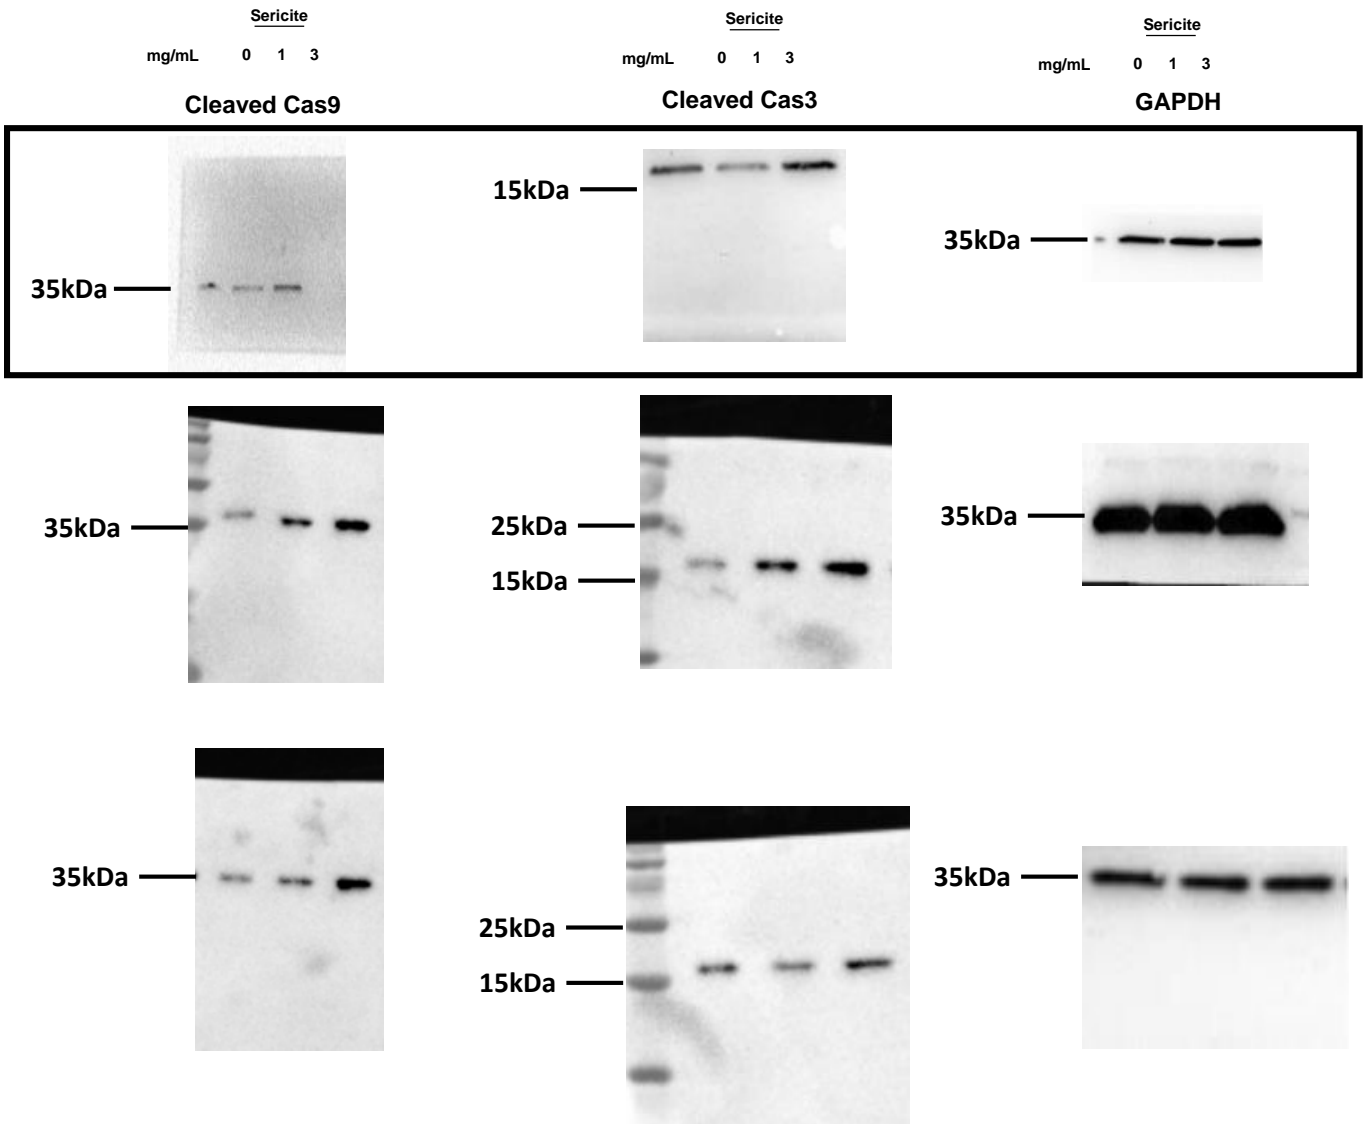

Supplementary Fig.6. Full-length western blot gel image for figure 1F.

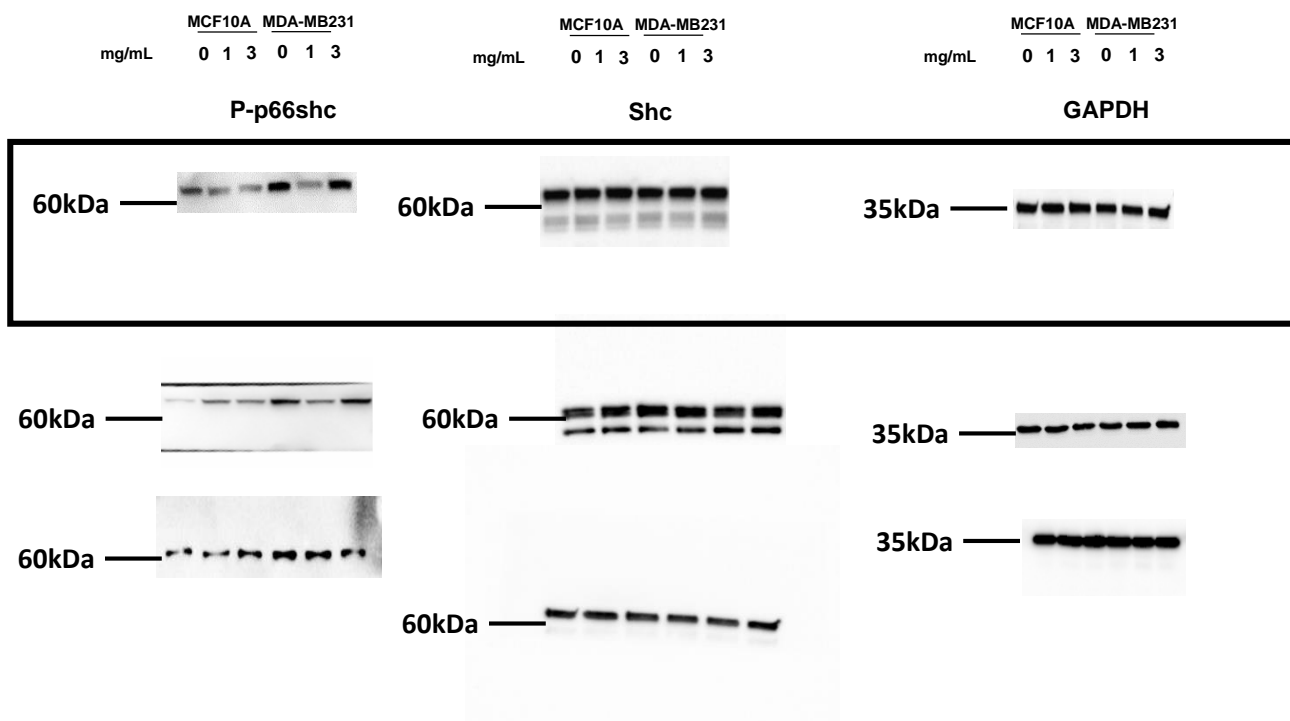

Supplementary Fig.7. Full-length western blot gel image for figure 2F.

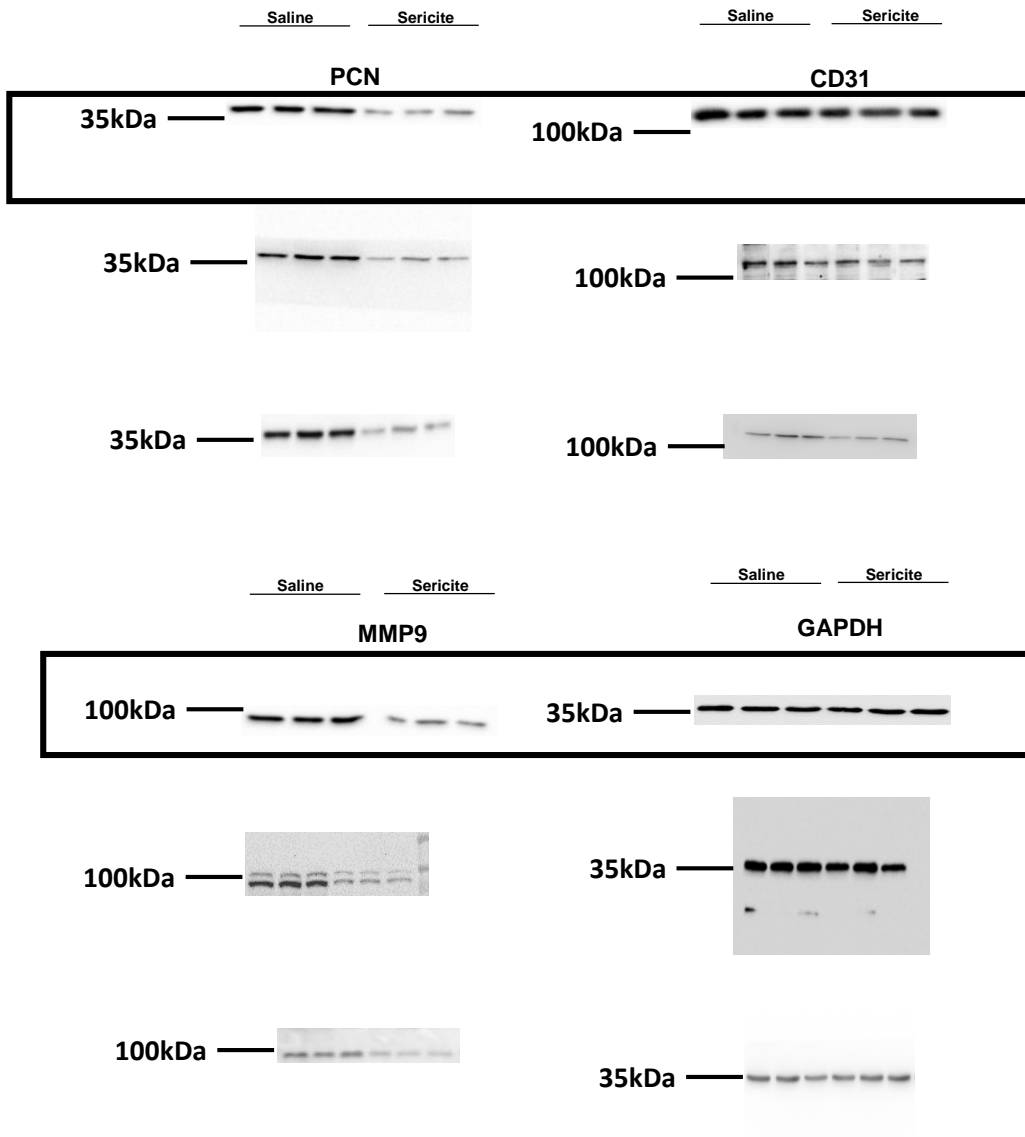

Supplementary Fig.8. Full-length western blot gel image for figure 3D.



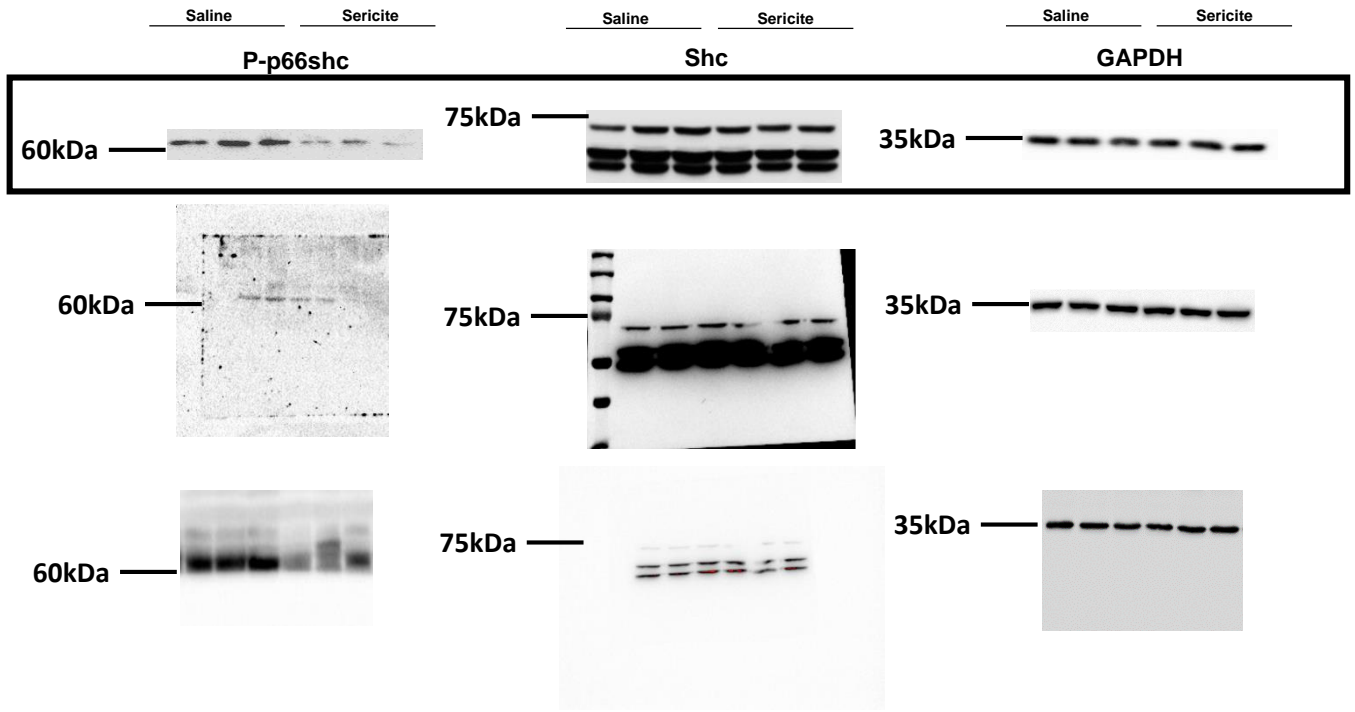

Supplementary Fig.9. Full-length western blot gel image for figure 4F.
